# Supplementary material
Source: PubMed Central journal article supplement (PMC4594755)
Supplement: NIHMS60744-supplement-Supplementary_Figures_1-7.pdf [file NIHMS60744-supplement-Supplementary_Figures_1-7.pdf]

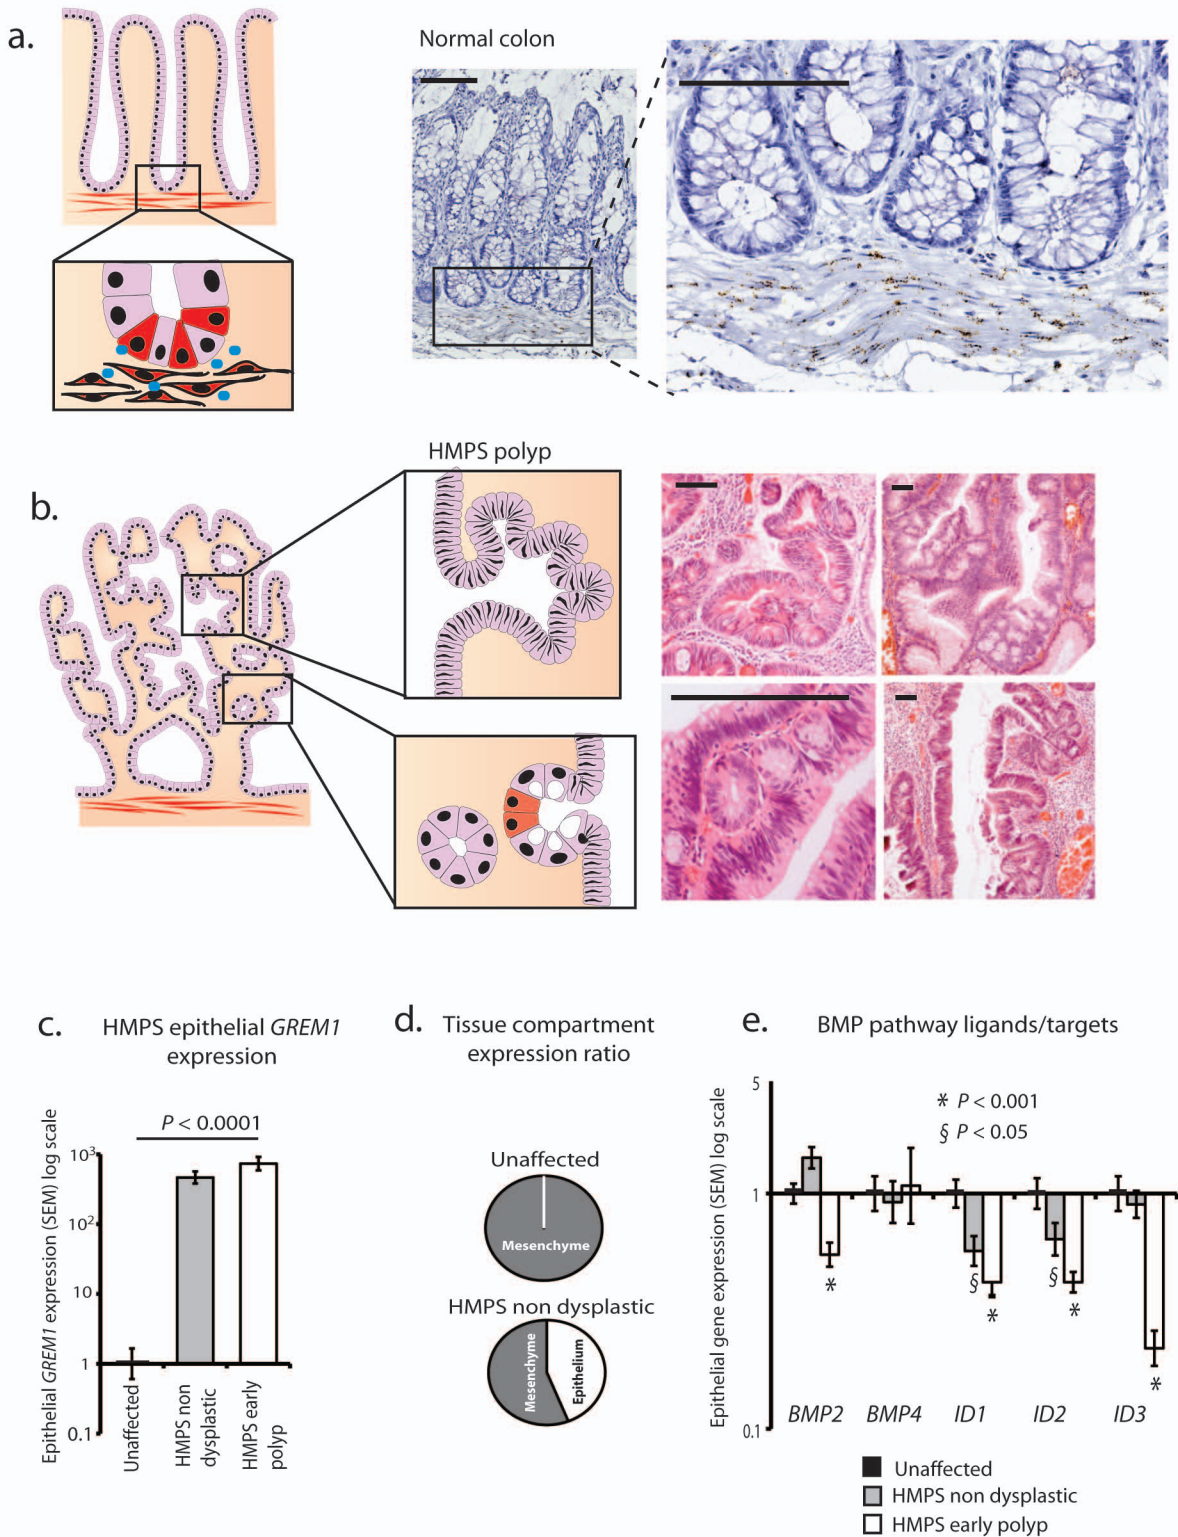

**(a)** Left panel: diagrammatic representation of physiological *GREM1* expression (blue dots) confined to the sub-cryptal myofibroblasts with the secreted protein acting on the cells of the crypt base (including crypt base columnar cells – red cells). Right panel: Human *GREM1* *in situ* hybridisation showing restricted expression (brown dots) from the sub-cryptal myofibroblast cells. **(b)** Left panel: Diagrammatic example of HMPS polyp morphology. Right panel: Ectopic crypts can have dysplastic pencil-like nuclear appearance or can appear non-dysplastic and goblet cell rich with complex clusters of ectopic crypts in advanced polyps. **(c)** Profound aberrant epithelial expression of *GREM1* in HMPS non-dysplastic and early polyp tissue with no candidate gene somatic mutation. **(d)** Change in tissue compartment expression ratio in HMPS patients based on ratio of qRT-PCR ddCt measurements. **(e)** BMP ligand and target expression in HMPS patients. Scale bars are 100  $\mu$ m.

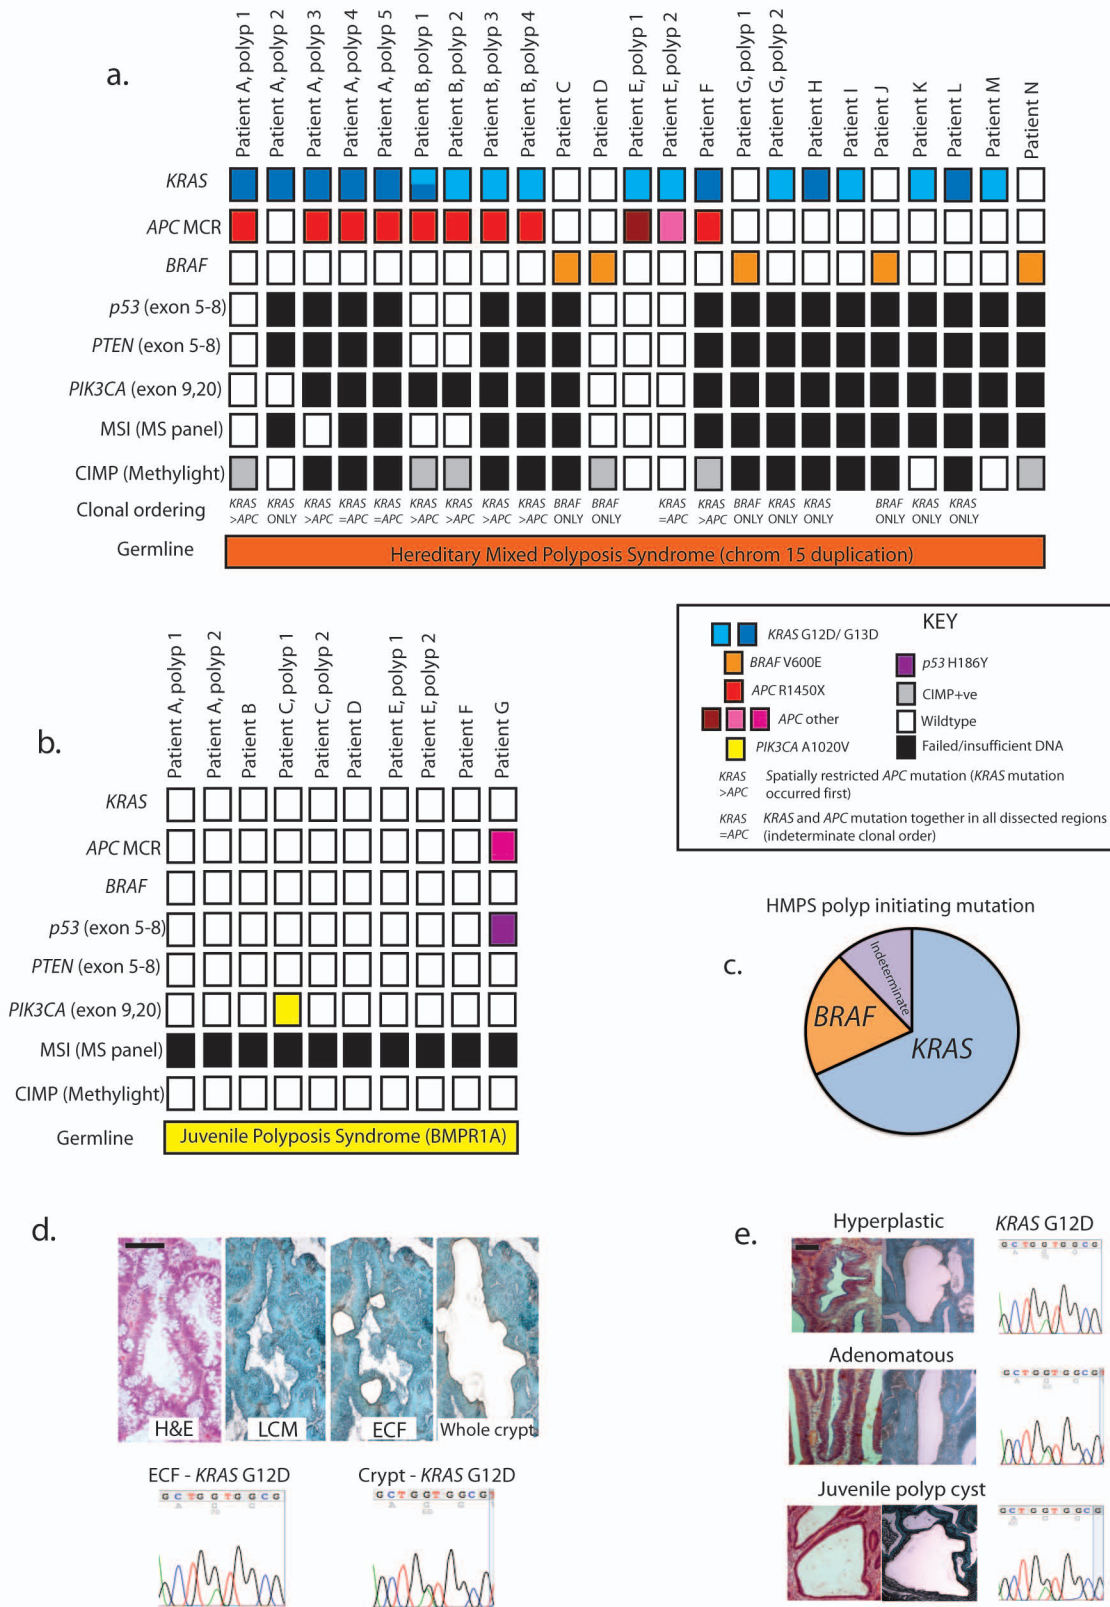

**(a)** HMPs polyps. **(b)** Juvenile Polyposis Syndrome polyps. Each column represents the results of candidate gene sequencing of a single dissected polyp. Clonal ordering row shows polyps that underwent individual crypt or multi-regional dissection to allow spatially distinct mutation identification **(c)** HMPs polyp initiating mutations determined by clonal ordering analysis. In 2 polyps, selective sweep of both *KRAS* and *APC* mutation across every dissected region meant that the initiating mutation could not be determined (indeterminate). **(d)** Microdissection of individual ectopic crypts showed that these contained the same mutation as the crypt body. **(e)** Different HMPs crypt morphological subtypes, had the same initiating mutation in each histological crypt type. Scale bars are 100  $\mu$ m.



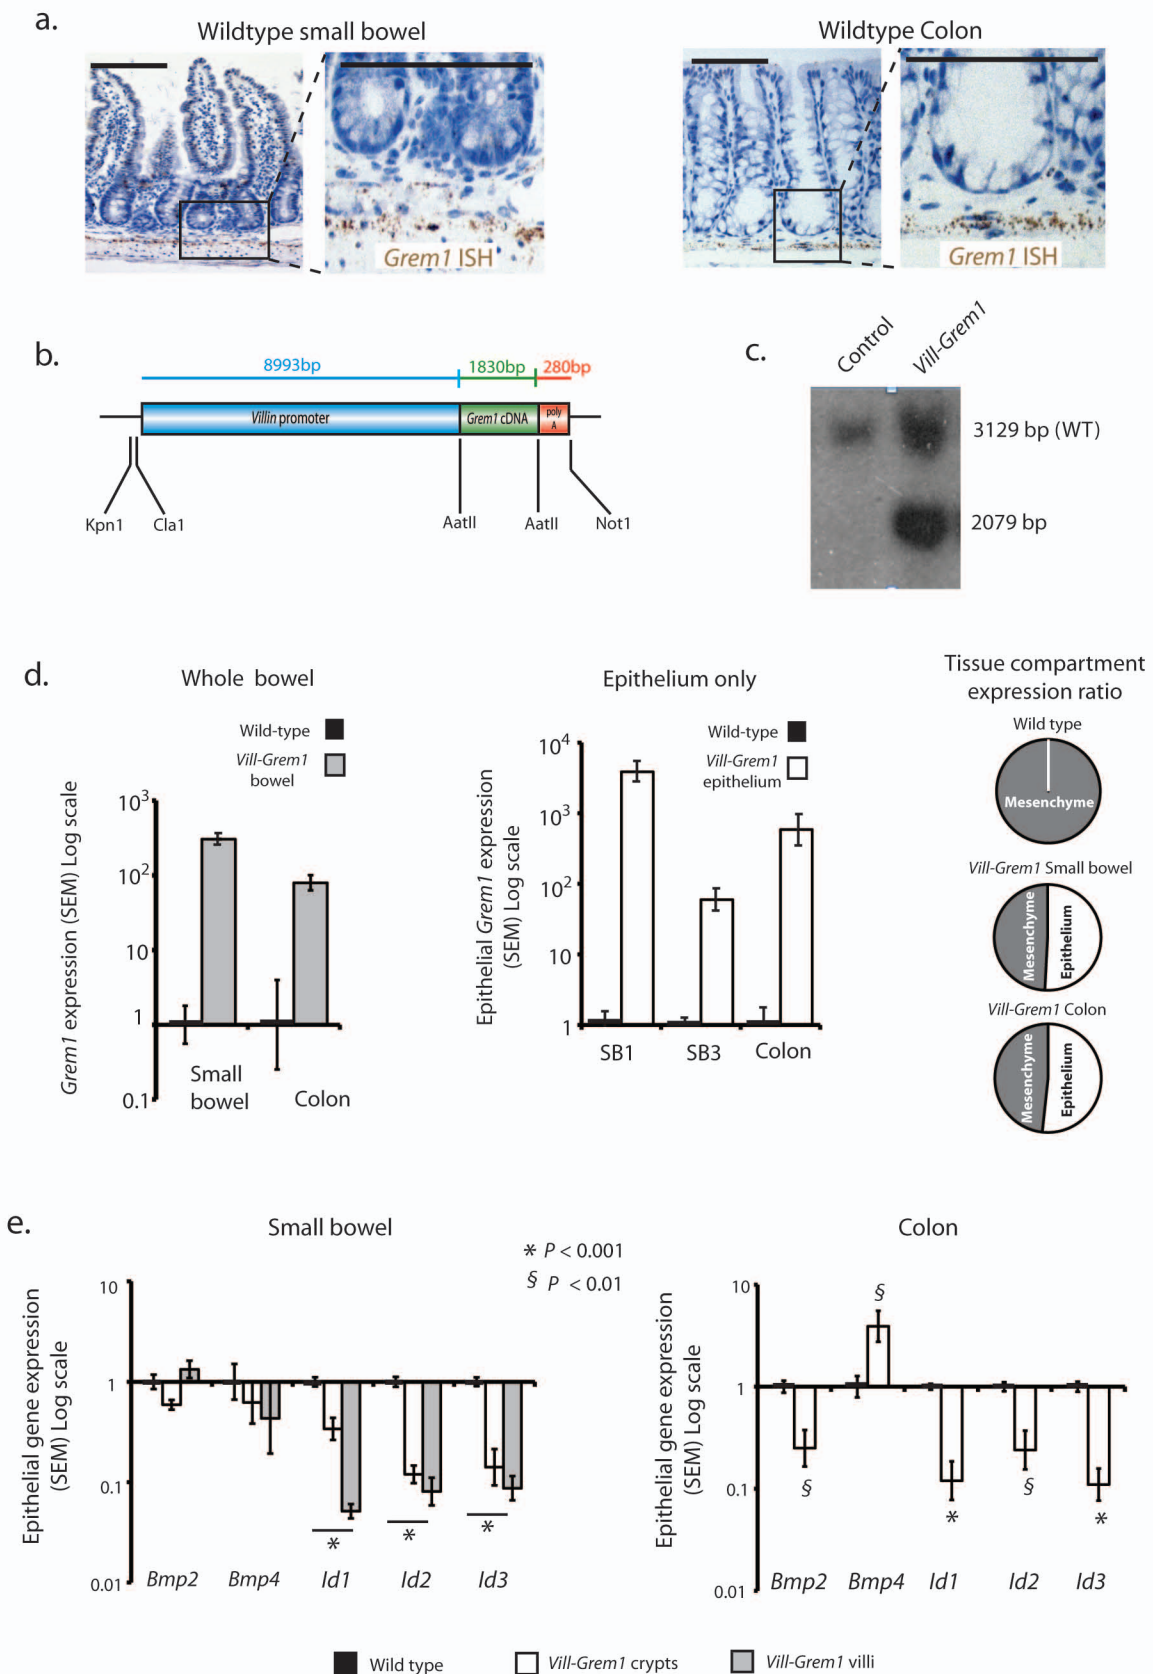

**(a)** Wildtype mouse *Grem1* *in situ* hybridisation showing restricted physiological expression of *Grem1* **(b)** *Vill-Grem1* mouse construct map. *Grem1* cDNA was inserted into the *Villin-MES-SV40polyA* plasmid downstream of the 9Kb villin promoter using *AatII* sites. **(c)** Southern blot of founder line mouse tail DNA showed a 2079 bp fragment of the inserted transgene. **(d)** *Grem1* expression in *Vill-Grem1* mice versus wild-type littermate. Left panel, whole small bowel and colon ( $P < 0.001$ , t test  $n = 4$ ). Middle panel: epithelium alone along the cephalic-caudal axis of the intestine ( $P < 0.001$ , t-test,  $n = 12$ ). Right panel: The tissue compartment expression ratio (based on ratio of qRT-PCR ddCt measurements) in wild-type and *Vill-Grem1* mice shows that the increased epithelial contribution accounts for the increase in overall intestinal expression of *Grem1*. **(e)** BMP pathway constituent expression in *Vill-Grem1* and control mice. Scale bars are 100  $\mu\text{m}$ .





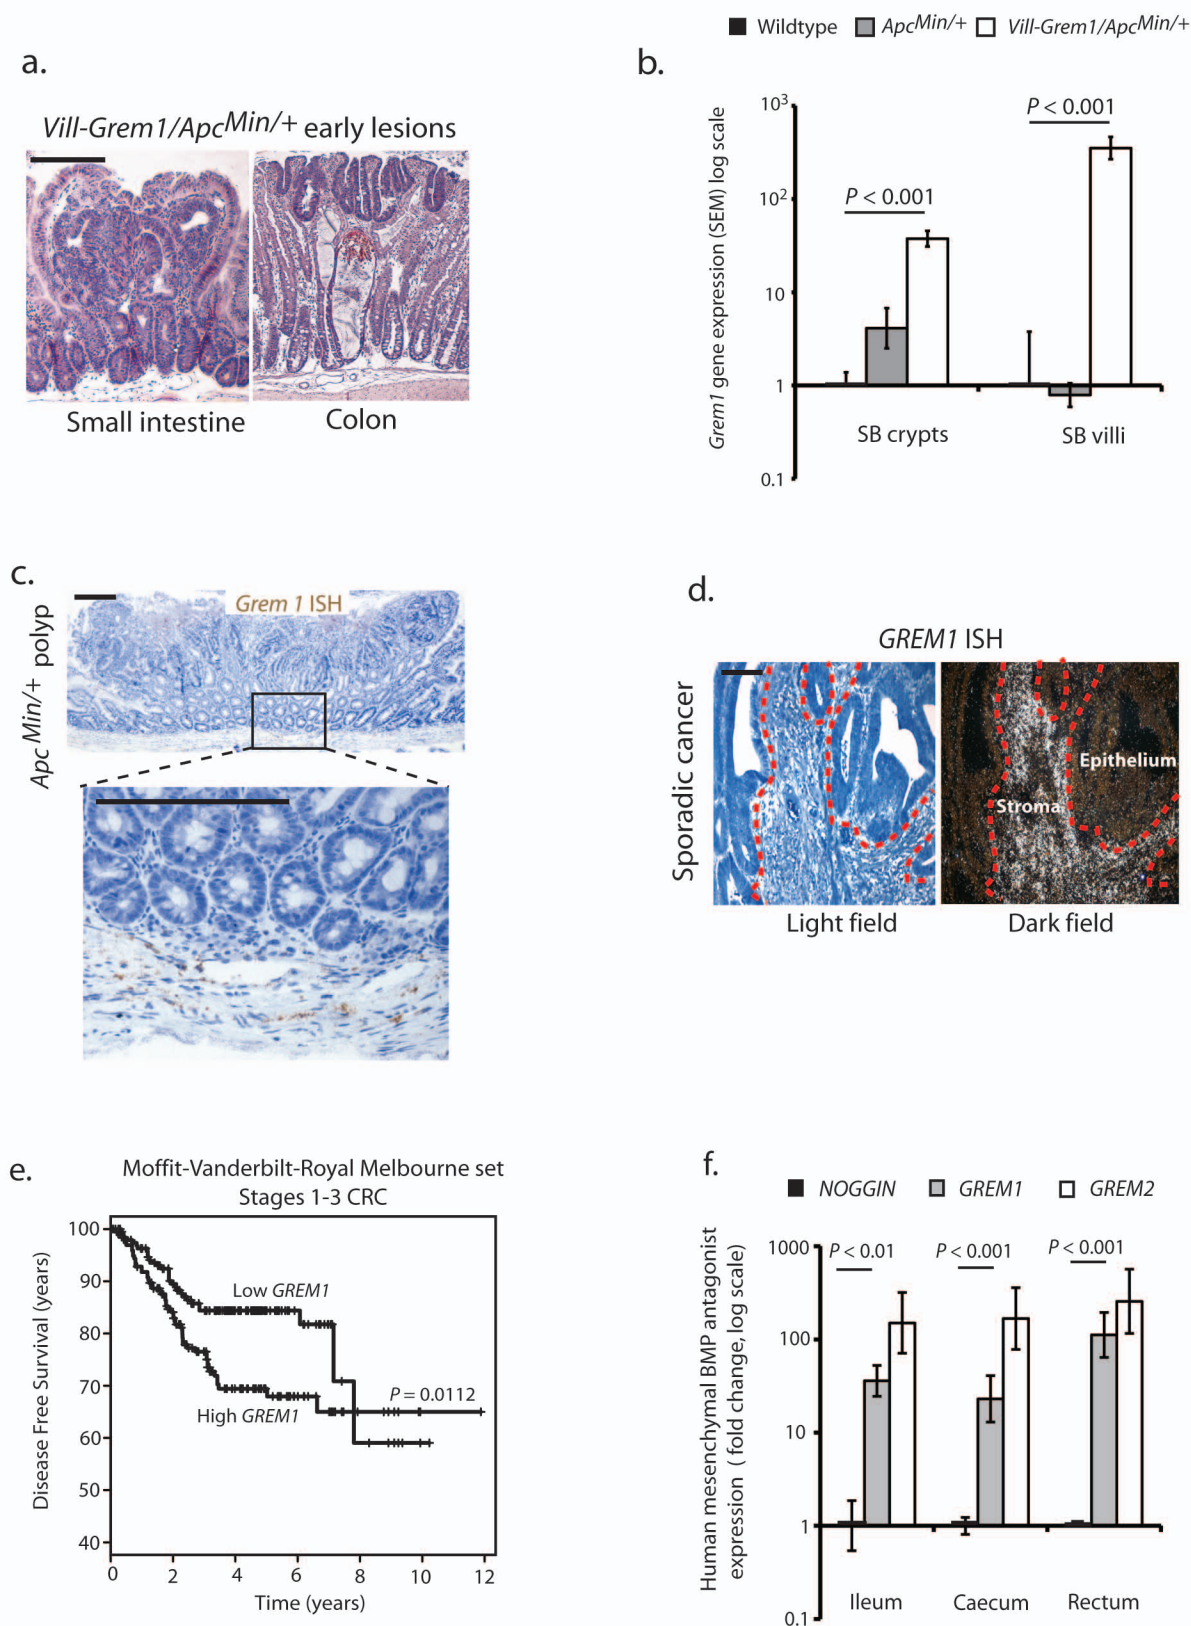

**(a)** Early *Vill-Grem1/ApcMin/+* small intestinal polyps rapidly develop intravillus crypt dysplasia often encompassed by non-dysplastic serrated epithelium. In the colon dysplastic aberrant crypt foci start at the luminal surface and bud downwards into the mucosa. **(b)** Epithelial *Grem1* expression in *ApcMin/+* and *Vill-Grem1/ApcMin/+* mice ( $P < 0.001$ , t test,  $n = 3$ ). **(c)** *In situ* hybridisation in *ApcMin* mouse polyp shows predominantly mesenchymal expression of *Grem1*. **(d)** *GREM1 in situ* hybridisation in human sporadic CRC reveals profound upregulation of *GREM1* expression in the desmoplastic stroma of a sporadic tumour. **(e)** Effect of *GREM1* expression on CRC survival in the Moffit-Vanderbilt-Royal Melbourne set ( $P = 0.0112$ , log rank test). **(f)** Physiological expression of BMP antagonists in the normal human mesenchyme showing less physiological expression of *Noggin* in the human intestinal mesenchyme in comparison to *GREM1* and *GREM2*. ( $P < 0.01$ , t-test,  $n = 4$ ). Scale bars are 100  $\mu$ m.

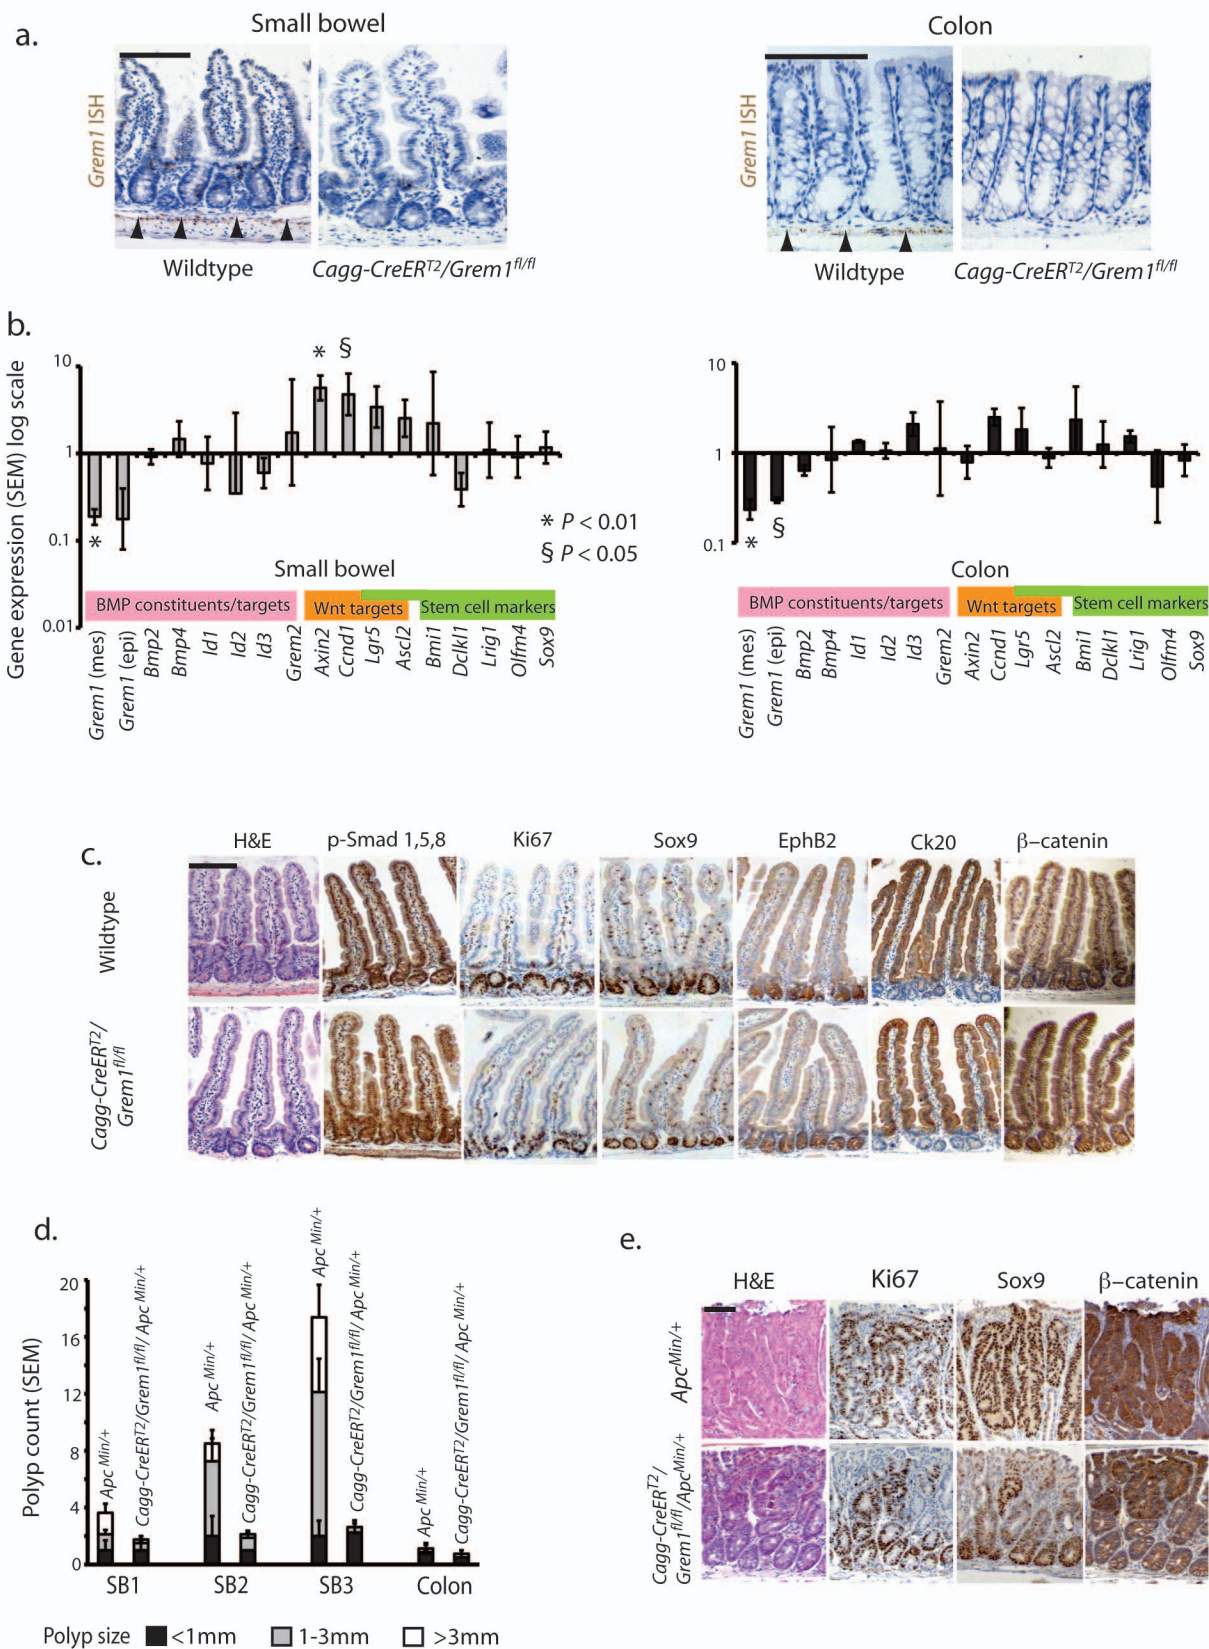

**(a)** *Grem1* *in situ* hybridisation showing effective knockout of the normal expression of *Grem1* in *Cagg-CreERT2/Grem1<sup>fl/fl</sup>* mice. Normal expression in control mice denoted by black arrowheads. **(b)** qRT-PCR of selected genes in the epithelium of *Cagg-CreERT2/Grem1<sup>fl/fl</sup>* versus wildtype mice. **(c)** Immunohistochemical analysis of *Cagg-CreERT2/Grem1<sup>fl/fl</sup>* small intestine. No significant difference to wildtype could be detected ( $n = 3$  mice). **(d)** Difference in polyp size in mean 248 day old *Apc<sup>Min/+</sup>* and age matched *Cagg-CreERT2/Grem1<sup>fl/fl</sup>/Apc<sup>Min/+</sup>* mice. ( $P < 0.001$ , logistic regression) ( $n = 4$  mice for test and non injected control). **(e)** Immunohistochemical comparison of *Apc<sup>Min/+</sup>* and *Cagg-CreERT2/Grem1<sup>fl/fl</sup>/Apc<sup>Min/+</sup>* polyps ( $n = 4$  mice). Scale bars are 100  $\mu\text{m}$ .



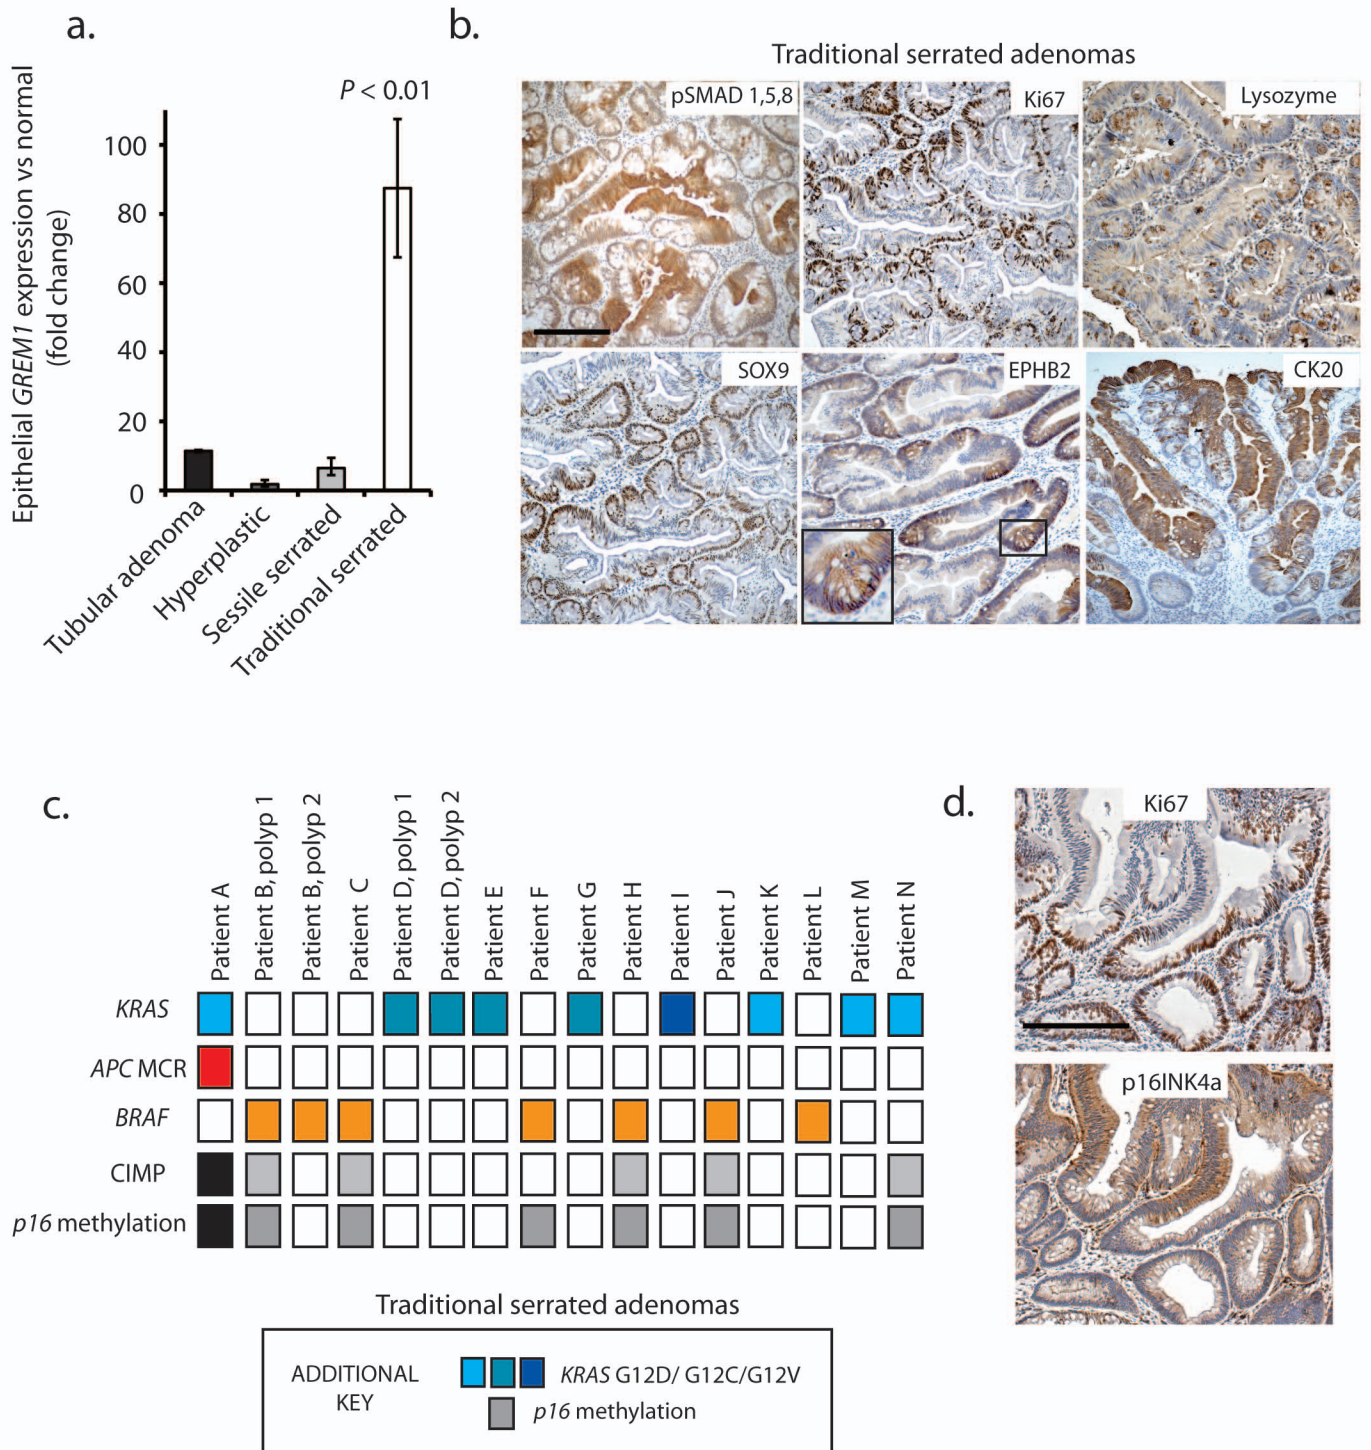

**(a)** Epithelial *GREM1* expression in different human polyp subtypes, with increased epithelial expression in traditional serrated adenomas ( $P < 0.01$ , t-test,  $n = 4$ ). **(b)** TSAs shared a similar immunohistochemical molecular phenotype to HMPs polyps ( $n = 10$  polyps). **(c)** TSA somatic mutations. Each column represents the results of candidate gene sequencing/methylation analysis of a single dissected polyp. **(d)** Loss of p16INK4a immunostaining in TSA lesions correlated with cell proliferation detected by Ki67 stain. Scale bars are 100  $\mu\text{m}$ .
